# Supplementary material for: Transient pattern formation in an active matter contact poisoning model
Source: Springer Nature journal article supplement (doi:10.1038/s42005-023-01387-7), 2023-10-14
Supplement: 42005_2023_1387_MOESM1_ESM.pdf [file 42005_2023_1387_MOESM1_ESM.pdf]

## **Description of Additional Supplementary Files**

**File name:** Supplementary Movie 1

**Description:** Supplemental movie showing the motion from Fig. 2.

**File name:** Supplementary Movie 2

**Description:** Supplemental movie showing the motion from Fig. 6 (a, b, c).

**File name:** Supplementary Movie 3

**Description:** Supplemental movie showing the motion from Fig. 6 (d, e, f).
